# Supplementary material for: A Meiotic Drive Element in the Maize Pathogen Fusarium verticillioides Is Located Within a 102 kb Region of Chromosome V
Source: PubMed Central journal article supplement (PMC4978907; doi:10.1534/g3.116.029728), 2016-06-10
Supplement: supp_g3.116.029728_FigureS1.pdf [file supp_g3.116.029728_FigureS1.pdf]

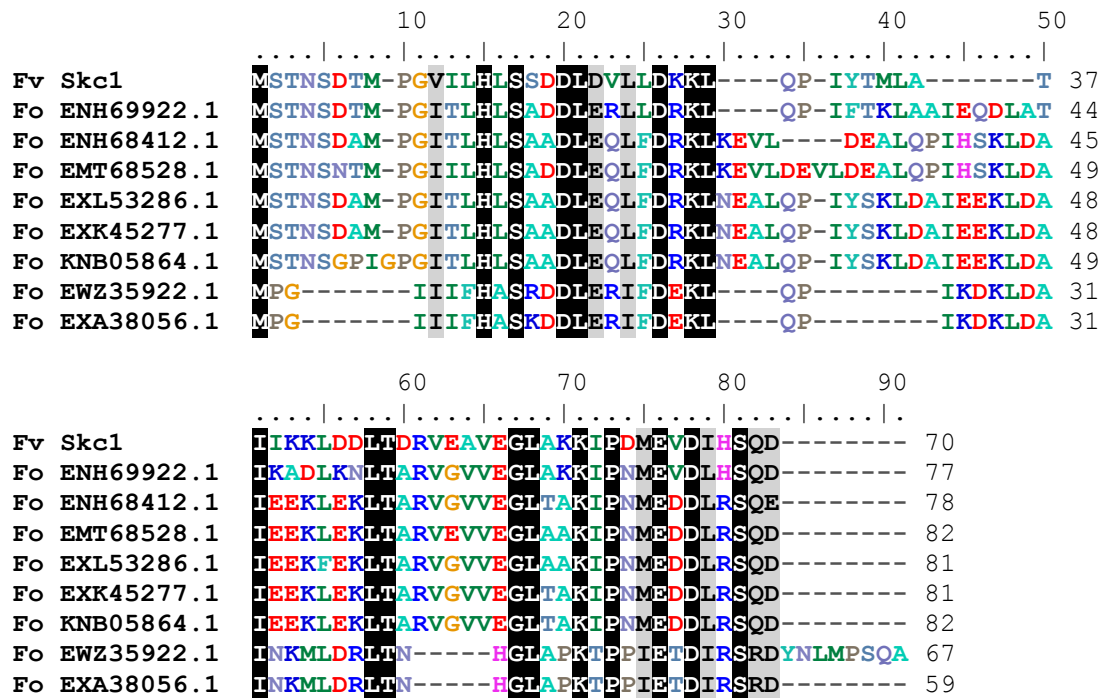

**Figure S1** Skc1 homologs exist within the *F. oxysporum* species complex. A BLASTP search of NCBI's non-redundant protein database with *F. verticillioides* Skc1 returned eight putative homologs, all from *F. oxysporum* species. The sequences were imported into Bioedit 7.2.5 and aligned with Clustal W. Columns were shaded according to the BLOSUM62 similarity matrix. Each sequence is identified by its accession number: Skc1, *F. verticillioides*; ENH69922.1, *F. oxysporum* f. sp. *cupense* race 1; EMT68528.1, *F. oxysporum* f. sp. *cupense* race 4; EXL53286.1, *F. oxysporum* f. sp. *radicis-lycopersici*; ENH68412.1, *F. oxysporum* f. sp. *cupense* race 1; EXK45277.1, *F. oxysporum* f. sp. *melonis*; KNB05864.1, *F. oxysporum* f. sp. *lycopersici*; EWZ35922.1, *F. oxysporum* Fo47; EXA38056.1, *F. oxysporum* f. sp. *pisi*. Only 82 amino acids from the C terminal end of KNB05864.1 were used in the analysis.
