# Supplementary material for: A Meiotic Drive Element in the Maize Pathogen Fusarium verticillioides Is Located Within a 102 kb Region of Chromosome V
Source: PubMed Central journal article supplement (PMC4978907; doi:10.1534/g3.116.029728), 2016-06-10
Supplement: supp_g3.116.029728_FigureS2.pdf [file supp_g3.116.029728_FigureS2.pdf]

FVEG\_03165

|            |                                                              |                                                    |                                                         |                                  |            |      |     |     |     |    |    |    |     |      |       |     |
|------------|--------------------------------------------------------------|----------------------------------------------------|---------------------------------------------------------|----------------------------------|------------|------|-----|-----|-----|----|----|----|-----|------|-------|-----|
| Fv999      | GCGAATGACCTGGGGAGCCATAATCGCC                                 | CATCCGCGTCGATTTGCAGTGGTACTTGGTAGTGAGGTCAAG         | 70                                                      |                                  |            |      |     |     |     |    |    |    |     |      |       |     |
| Fv149      | GCGAATGACCTGGGGAGCCATAATCGGCC                                | -----                                              | 29                                                      |                                  |            |      |     |     |     |    |    |    |     |      |       |     |
| Fv999      | AGTGCAAGTGGGCCTTAAATCGCTCATG                                 | CCTTATTGGGTTCCGCAACTCAACTTAGCTTCAACAAGCT           | 140                                                     |                                  |            |      |     |     |     |    |    |    |     |      |       |     |
| Fv149      | -----                                                        | GCTTCTTCCTTTTCGGG                                  | 47                                                      |                                  |            |      |     |     |     |    |    |    |     |      |       |     |
| Fv999      | TTAATGGAGGAAGGTTTAACTCAAGAGTTCGCTTTTATAAACCA                 | GGCGTCCATCTTCTGTCTTCTGTTTA                         | 210                                                     |                                  |            |      |     |     |     |    |    |    |     |      |       |     |
| Fv149      | -----                                                        | GGCTTGTTCGTAGACT                                   | 73                                                      |                                  |            |      |     |     |     |    |    |    |     |      |       |     |
| Fv999      | CTTTCTTCCTTACACACAATTCCATCAATCCACTACACAATTCCATCAA            | -----                                              | 280                                                     |                                  |            |      |     |     |     |    |    |    |     |      |       |     |
| Fv149      | -----                                                        | -----                                              | 73                                                      |                                  |            |      |     |     |     |    |    |    |     |      |       |     |
| Fv999      | TCCACTACACAAACACAAGTTGTCTATCAAGAAATCATCTCTCAT                | TCTATCTCCAGATCACCAATCAAT                           | 350                                                     |                                  |            |      |     |     |     |    |    |    |     |      |       |     |
| Fv149      | -----                                                        | -----                                              | 73                                                      |                                  |            |      |     |     |     |    |    |    |     |      |       |     |
| Fv999      | ACAGCCATGTCTACCAACTCAGACACCAATGCC                            | TGGCGTATCCTCCACCTTTCATCAGATGATCTTGATG              | 420                                                     |                                  |            |      |     |     |     |    |    |    |     |      |       |     |
| Fv149      | -----                                                        | GTGGTGGCGCTGT                                      | 91                                                      |                                  |            |      |     |     |     |    |    |    |     |      |       |     |
| Fv999      | TTTGTGTTGATAAGCAAGCTTACAGCCTATTTACACTATGCTGG                 | CTACTATTATCAAGAAAC                                 | TTGATGATCT                                              | 490                              |            |      |     |     |     |    |    |    |     |      |       |     |
| Fv149      | TTGCGCTTGGGGGATCG                                            | -----                                              | GCTGGAGAC                                               | GGGAGGGG                         | AAAAGTTGA  | CT   | 138 |     |     |    |    |    |     |      |       |     |
| Fv999      | TACCGACCGTGTGAGGCAAGTTGAGGC                                  | CCTGGCGAAAAGATCCCGGACATGGAAGTCGATATCCATTCT         | 560                                                     |                                  |            |      |     |     |     |    |    |    |     |      |       |     |
| Fv149      | TAT                                                          | GT                                                 | TTGAC                                                   | TTG                              | TTAGG      | TC   | GGT | GCT | AAA | GC | TC | CT | GGA | GAAG | ----- | 183 |
| Fv999      | CAAGACTAGAGCCTGAGAAGAATGAGGCGCAGCTT                          | TGTGCAAGGACATGGTTAGTTCTGTTCTCTAGAAT                | 630                                                     |                                  |            |      |     |     |     |    |    |    |     |      |       |     |
| Fv149      | -----                                                        | AGTTCAGAAGACTG                                     | -----                                                   | CCTCTTCGGG                       | 209        |      |     |     |     |    |    |    |     |      |       |     |
| Fv999      | GAATAATATATGCTAATACCAAGACAGATTCAAGACTTTCTTTAG                | CTCATTCCCATGTCGGGCTGGAC                            | 700                                                     |                                  |            |      |     |     |     |    |    |    |     |      |       |     |
| Fv149      | -----                                                        | TACATGCT                                           | -----                                                   | GAC                              | 221        |      |     |     |     |    |    |    |     |      |       |     |
| Fv999      | CTTTGAAGAGGCGATCGTGACAAACGCCGAGGCG                           | ATGGTTGGGTGCGCTGATGGAGGTGGTGGAGAGATG               | 770                                                     |                                  |            |      |     |     |     |    |    |    |     |      |       |     |
| Fv149      | CTTTGAAGAGGCGATCGTGACAAACGCCGAGGCG                           | ATGGTTGGATGCGCTGATGGAGGTGGTGGAGAGATG               | 291                                                     |                                  |            |      |     |     |     |    |    |    |     |      |       |     |
| Fv999      | TCATATCGGCGTGGTTGGAGGTGAGGGACAGTAAAT                         | TGGGCACGTACCCTACCTGAGTACTATGCTG                    | 840                                                     |                                  |            |      |     |     |     |    |    |    |     |      |       |     |
| Fv149      | TTATATAGGCGTGGTTGGAGGTGAGGGACAGTAAAT                         | TGGGCACGTACCCTACCTGAGTACTACGCTG                    | 361                                                     |                                  |            |      |     |     |     |    |    |    |     |      |       |     |
| Fv999      | ACGCAGTATT                                                   | CATATGGACATGCACTCAT                                | TCTTGTAGGTCATGATAAGTCCATCCATCATATCATAGACT               | 910                              |            |      |     |     |     |    |    |    |     |      |       |     |
| Fv149      | ACA                                                          | CAGTATT                                            | AATATGGACATGCACTCAGTCTTGTAGGTCATGATAAGTCCATCCATCATATCAT | 426                              |            |      |     |     |     |    |    |    |     |      |       |     |
| Fv999      | ACCCCGCCATGAACTGGAGTGCTTCACTCTATCTCGGCGGCTTT                 | AATCCCAATACGAAAATGTTATCTCG                         | 980                                                     |                                  |            |      |     |     |     |    |    |    |     |      |       |     |
| Fv149      | ACCCCGCCATGAACTGGAGTGCTTCACTCTATCTCGGCGGCTTT                 | AATCCCAATACGAAAATGTTATCTCA                         | 496                                                     |                                  |            |      |     |     |     |    |    |    |     |      |       |     |
| Fv999      | AGGTTTTCGTTTATCA                                             | CAATCTCCATGTTACAGATCATTATGCAAGTCATAAATCTAACAT      | TAAATCAA                                                | 1050                             |            |      |     |     |     |    |    |    |     |      |       |     |
| Fv149      | AGGTTTTCGTTTATCAGAATCCCATGTTACAGATCATTATGCAAGTCATAAATCTAACAT | CAAATCAA                                           | 566                                                     |                                  |            |      |     |     |     |    |    |    |     |      |       |     |
| Fv999      | TTGTTTGTGCTATCGCTATGCGTACTCCATAATCCG                         | TCCGAAATCGCAGCCAGTTCAATTTACAGCAG                   | 1120                                                    |                                  |            |      |     |     |     |    |    |    |     |      |       |     |
| Fv149      | TTGTTTGTGCTATCGCTATGCGTACTCCATAATCCG                         | TCCGAAATCAGCC                                      | CC                                                      | TTCAATTTACAGCAG                  | 635        |      |     |     |     |    |    |    |     |      |       |     |
| Fv999      | TCTCC                                                        | CTCTGATGGTCTCA                                     | -----                                                   | CCACACCCACCATCAATAATTGTCGCGTGTTC | TACCCCCCAA | 1183 |     |     |     |    |    |    |     |      |       |     |
| Fv149      | TCTCTCCCTCTGAAGGTCTCAGTACCACACCCACCATCAATAATTGTTGGTGTTC      | CTGAA                                              | CCCCCAA                                                 | 704                              |            |      |     |     |     |    |    |    |     |      |       |     |
| Fv999      | TGCTAAGCCATTGCGCATG                                          | ATCTGATGTTTAGTGTACAACTTTGCATCTACTCACTTCTAGATCTCGTC | 1253                                                    |                                  |            |      |     |     |     |    |    |    |     |      |       |     |
| Fv149      | TGCTAAGCCATTGCGCATG                                          | ATCTGATGTTTAGTGTACAACTTTGCATCTACTCACTTCTAGATCTCGTC | 774                                                     |                                  |            |      |     |     |     |    |    |    |     |      |       |     |
| FVEG_03164 |                                                              |                                                    |                                                         |                                  |            |      |     |     |     |    |    |    |     |      |       |     |
| Fv999      | GTTTACTGCTTCTTCTTCTT                                         | 1273                                               |                                                         |                                  |            |      |     |     |     |    |    |    |     |      |       |     |
| Fv149      | GTTTACTGCTTCTTCTTCTT                                         | 794                                                |                                                         |                                  |            |      |     |     |     |    |    |    |     |      |       |     |

**Figure S2** A Clustal W alignment of the *FVEG\_03165-FVEG\_03164* intergenic region from Fv999-*Sk<sup>K</sup>* and Fv149-*Sk<sup>S</sup>*. The coding start site of flanking gene *FVEG\_03165* is marked with a blue arrow. Similarly, the coding stop site of flanking gene *FVEG\_03164* is marked with a blue line. The predicted coding sequence of *SKC1* is marked by a red line. This alignment shows that *SKC1* is present in Fv999-*Sk<sup>K</sup>* but not Fv149-*Sk<sup>S</sup>*.
