# Supplementary material for: A Meiotic Drive Element in the Maize Pathogen Fusarium verticillioides Is Located Within a 102 kb Region of Chromosome V
Source: PubMed Central journal article supplement (PMC4978907; doi:10.1534/g3.116.029728), 2016-06-10
Supplement: supp_g3.116.029728_FigureS3.pdf [file supp_g3.116.029728_FigureS3.pdf]

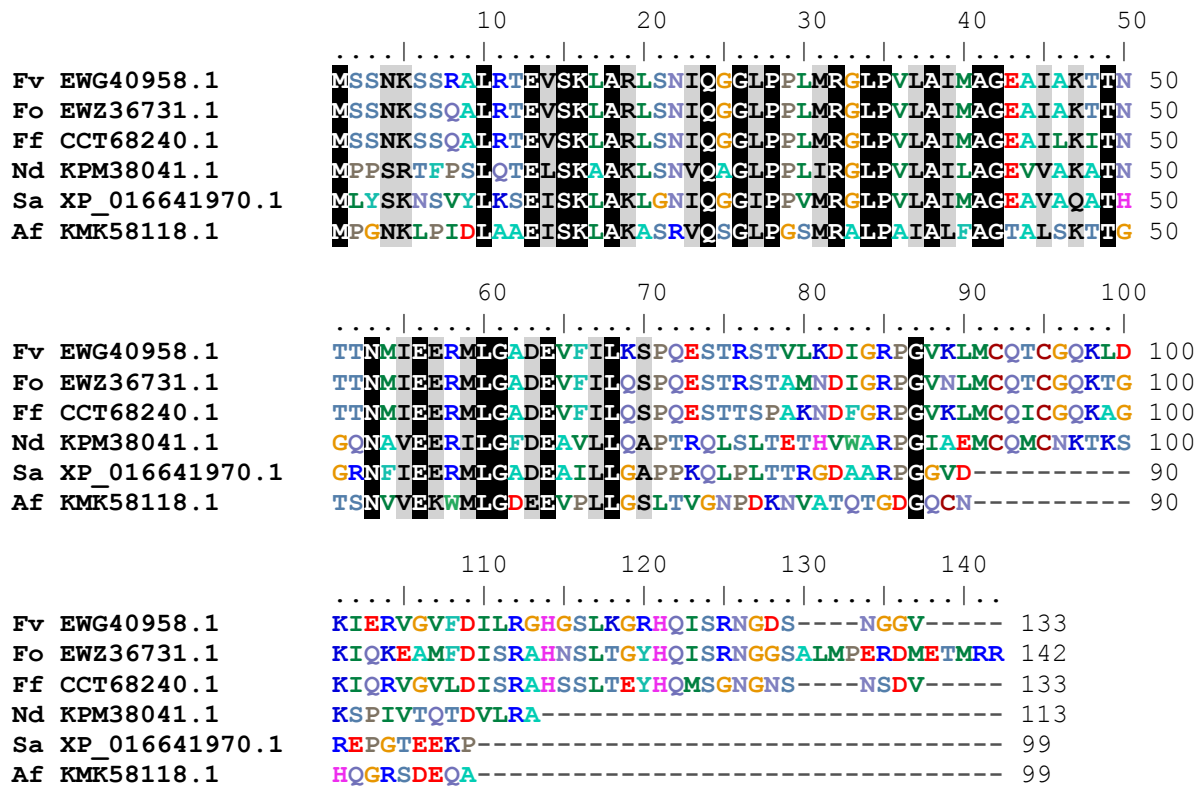

**Figure S3** Sequence alignment of putative Fveg\_15999 homologs. A BLASTP search of NCBI's non-redundant protein database was performed with the sequence of *F. verticillioides* Fveg\_15999. The sequences of five putative homologs were downloaded, imported into Bioedit 7.2.5, and aligned with Clustal W. Columns were shaded according to the BLOSUM62 similarity matrix. Each sequence is identified by its accession number: EWG40958.1 (Fveg\_15999), *F. verticillioides*; EWZ36731.1, *F. oxysporum* Fo47; CCT68240.1, *F. fujikuroi*; KPM38041.1, *Neonectria ditissima*; XP\_016641970.1, *Scedosporium apiospermum*; KMK58118.1, *Aspergillus fumigatus*.
