# Supplementary material for: A Meiotic Drive Element in the Maize Pathogen Fusarium verticillioides Is Located Within a 102 kb Region of Chromosome V
Source: PubMed Central journal article supplement (PMC4978907; doi:10.1534/g3.116.029728), 2016-06-10
Supplement: supp_g3.116.029728_FigureS5.pdf [file supp_g3.116.029728_FigureS5.pdf]

|    |                |                                                             |       |          |        |           |                    |    |
|----|----------------|-------------------------------------------------------------|-------|----------|--------|-----------|--------------------|----|
|    |                | 10                                                          | 20    | 30       | 40     | 50        |                    |    |
|    |                | ..... ..... ..... ..... ..... ..... ..... ..... ..... ..... |       |          |        |           |                    |    |
| Fv | EWG40993.1     | MA                                                          | ----- | EEKK     | --     | IPVTN     | -----              | 11 |
| Fo | EWZ36697.1     | MA                                                          | ----- | EEKK     | --     | IPVTN     | -----              | 11 |
| Ff | KLO94664.1     | MA                                                          | ----- | EEKK     | --     | IPVTN     | -----              | 11 |
| Nh | XP_003053984.1 | MA                                                          | ----- | SSQREE   | IPITN  |           | -----              | 13 |
| Ct | KZL78281.1     | MR                                                          | ----- | RPRQTSFP | ITKL   | PSSPASAD  | FISAGPSLIDATL      | 35 |
| Th | KKP02497.1     | MS                                                          | ----- | LEAHD    |        |           | -----              | 7  |
| Nc | XP_960303.1    | MSDNN                                                       | ----- | TTSTKYS  | DTREDV | PTPSLACH  | -----              | 26 |
| Af | KMK62774.1     | MS                                                          | ----- | CHQH     | IPR    |           | -----              | 9  |
| Pf | KTC53377.1     | MSEIR                                                       | ----- | KAHGVSM  | IGAALL | LAPILAGC  | AGNNSASS           | 33 |
| Ap | WP_026019211.1 | MSF                                                         | LHNF  | SCRR     | CFNR   | TLTAAL    | VAAPFATLSGRQANAADK | 39 |
| Se | WP_058683418.1 | MKILP                                                       | ----- | LAL      |        | FIIPFLAGC | GANNTPPQ           | 25 |

|    |                |                                                             |         |         |         |          |                    |          |    |
|----|----------------|-------------------------------------------------------------|---------|---------|---------|----------|--------------------|----------|----|
|    |                | 60                                                          | 70      | 80      | 90      | 100      |                    |          |    |
|    |                | ..... ..... ..... ..... ..... ..... ..... ..... ..... ..... |         |         |         |          |                    |          |    |
| Fv | EWG40993.1     | -----                                                       | EGMGKPL | SAKNOVL | TAGAAVT | QEFRPVKH | ICAHLNAF           | 48       |    |
| Fo | EWZ36697.1     | -----                                                       | EGMGKPL | SVKNEVL | TAGAAVT | QEFRPVKH | ICAHLNAF           | 48       |    |
| Ff | KLO94664.1     | -----                                                       | EGMGNPL | SAKNOVL | TAGAAVT | QEFRPVKH | ICAHLNAF           | 48       |    |
| Nh | XP_003053984.1 | -----                                                       | EGMGQPL | SATNOVL | TAGAAVT | QDFRPVKS | ICAHLNAF           | 50       |    |
| Ct | KZL78281.1     | QSRLRPT                                                     | MAAKPG  | SNAGEPI | STKNQVL | QAGASAI  | QDFAPLRNVCAHLNAF   | 85       |    |
| Th | KKP02497.1     | -----                                                       | KAPGDL  | LPEKED  | TVLSSA  | SFTQDF   | FKPVKNI            | CAHLNAF  | 44 |
| Nc | XP_960303.1    | -----                                                       | DPSNPS  | IPGSPK  | TTLSA   | LETGAS   | LAQDFSPVKS         | ICAHLNAF | 68 |
| Af | KMK62774.1     | -----                                                       | DQDGI   | PGSPL   | STKSRV  | LEGGAS   | MVQDFTPVKQ         | ICAHLNAF | 49 |
| Pf | KTC53377.1     | -----                                                       | VVAPG   | APQSP   | ATQSL   | DAGAALL  | QSRPPIDALNAYLDGF   | 71       |    |
| Ap | WP_026019211.1 | -----                                                       | KLMPVS  | GSSKSM  | RSHIL   | DTAADT   | LQTKKPIDAMSEYLN    | 79       |    |
| Se | WP_058683418.1 | -----                                                       | TPIPG   | EKTS    | AKLRL   | LETG     | AAAIQSRPPVDAISTYLN | 63       |    |

|    |                |                                                             |        |        |        |        |                      |     |
|----|----------------|-------------------------------------------------------------|--------|--------|--------|--------|----------------------|-----|
|    |                | 110                                                         | 120    | 130    | 140    | 150    |                      |     |
|    |                | ..... ..... ..... ..... ..... ..... ..... ..... ..... ..... |        |        |        |        |                      |     |
| Fv | EWG40993.1     | HAYADD                                                      | PSRFVE | TNHYCA | HLN    | -----  | EDVRQCLLYDSDEP       | 83  |
| Fo | EWZ36697.1     | HAYADD                                                      | PSRFVE | TNHYCA | HLN    | -----  | EDVRQCLLYDSDEP       | 83  |
| Ff | KLO94664.1     | HAYADD                                                      | PSRFVE | TNHYCA | HLSTSL | TNRSTR | SLTPADEDVRQCLLYDSDEP | 98  |
| Nh | XP_003053984.1 | HAYADD                                                      | PKRFVE | ANHYCA | HLN    | -----  | EDVRQCLLYDSDEP       | 85  |
| Ct | KZL78281.1     | HAYASD                                                      | PSRVVE | ANHYCG | HLN    | -----  | EDVRQCILYDSPEP       | 120 |
| Th | KKP02497.1     | HAYAND                                                      | PMRSVE | ANHYCS | QLD    | -----  | DEVROCVLYDSPEP       | 79  |
| Nc | XP_960303.1    | HVYASD                                                      | PTRFVE | ANHYCA | HLT    | -----  | EDVRQCILYDSPNP       | 103 |
| Af | KMK62774.1     | HVYASD                                                      | QTRAVE | ANHYCT | HVT    | -----  | EDLRQCCLYDSTKP       | 84  |
| Pf | KTC53377.1     | HFYNGH                                                      | MDAQME | AHHC   | AILN   | -----  | EEVIQCVIYDGNRK       | 106 |
| Ap | WP_026019211.1 | HFYADD                                                      | MGRQIE | ANHFCT | HLT    | -----  | EDFHQCVIYEANQP       | 114 |
| Se | WP_058683418.1 | HFYSGD                                                      | KNGQME | AHHY   | VTVLN  | -----  | EDVMQAVIYDGNTK       | 98  |

|    |                |                                                             |        |        |        |       |                   |                |     |     |
|----|----------------|-------------------------------------------------------------|--------|--------|--------|-------|-------------------|----------------|-----|-----|
|    |                | 160                                                         | 170    | 180    | 190    | 200   |                   |                |     |     |
|    |                | ..... ..... ..... ..... ..... ..... ..... ..... ..... ..... |        |        |        |       |                   |                |     |     |
| Fv | EWG40993.1     | NARLIG                                                      | IEYMIT | PKLYET | LDKEER | KLWHS | HVYEVKSGMLIMP--   | NRAVPE         | 131 |     |
| Fo | EWZ36697.1     | NARLIG                                                      | IEYMVT | PKLYET | LDKEER | KLWHS | HVYEVKSGMLIMP--   | NRAVPE         | 131 |     |
| Ff | KLO94664.1     | NARLIG                                                      | IEYMIT | PKLYET | LDKEER | KLWHS | HVYEVKSGMLIMP--   | NRAVPE         | 146 |     |
| Nh | XP_003053984.1 | TARLIG                                                      | IEYMIT | PKLYD  | TLSKEE | KLWHS | HAYEVKSGMLIMP--   | NRAVPE         | 133 |     |
| Ct | KZL78281.1     | NARIIG                                                      | IEYMIT | PKLYET | LDAAE  | ERKLW | HSHVYEVKSGMLIMP-- | QMTLPD         | 168 |     |
| Th | KKP02497.1     | NARIIG                                                      | IEYMIT | PKRYE  | SLPAD  | ERRLW | HSHVYEVKSGMLVMP-- | NRMVPK         | 127 |     |
| Nc | XP_960303.1    | GARILG                                                      | IEYMIT | PKLYET | LPQ    | QERRY | WHTHVFEVKS        | GMLIMPKPPGLMPQ | 153 |     |
| Af | KMK62774.1     | NARLIG                                                      | VEYMI  | SPRLF  | ETLP   | SEER  | KLWHTHEFEVKS      | GMLIMPAPAG--   | VPK | 133 |
| Pf | KTC53377.1     | DAKLMG                                                      | VEYI   | ISEQL  | FAGL   | PKSEQ | ALWHS             | HVYEVKSGQLVAP  | 148 |     |
| Ap | WP_026019211.1 | NARLIG                                                      | IEYIV  | SERIF  | FKTL   | PDDEK | KLWHS             | HYEVKSGMLVAP   | 156 |     |
| Se | WP_058683418.1 | NARLMG                                                      | VEYI   | ISERL  | FKTL   | PEEK  | KLWHS             | QYEVKSGSLVAP   | 140 |     |

|     |     |     |     |     |
|-----|-----|-----|-----|-----|
| 210 | 220 | 230 | 240 | 250 |
|-----|-----|-----|-----|-----|
