# Supplementary material for: A Meiotic Drive Element in the Maize Pathogen Fusarium verticillioides Is Located Within a 102 kb Region of Chromosome V
Source: PubMed Central journal article supplement (PMC4978907; doi:10.1534/g3.116.029728), 2016-06-10
Supplement: supp_g3.116.029728_TableS1.pdf [file supp_g3.116.029728_TableS1.pdf]

**Table S1 Oligonucleotide primers for CAPS markers**

| Name     | Sequence (5' to 3')       |
|----------|---------------------------|
| CAPS-1F  | GCGATACAGAACCCCCATTCTCTT  |
| CAPS-1R  | GATCAGCCATCCTATCTCTCCCAGT |
| CAPS-2F  | TTATCTGCACACCTGGAGGA      |
| CAPS-2R  | CGGCTTCACCTGAGACATTT      |
| CAPS-3F  | CCAGAATGGCTCTGACCTGGTGT   |
| CAPS-3R  | GCGCAGATCATGGAGAGGGTATG   |
| CAPS-4F  | ATGTGTGCAGCTCGTTTTTG      |
| CAPS-4R  | TCAACCCCGAGACTTTCATC      |
| CAPS-5F  | GACCAGACCCGAAACCAAT       |
| CAPS-5R  | CAGCCAAATCACGCTGTCT       |
| CAPS-6F  | GGTCGAGAACAAAGGGGTTC      |
| CAPS-6R  | CAAAGATGGGAGGAACATGG      |
| CAPS-9F  | CGCGGTTGACACGGCTCTC       |
| CAPS-9R  | GAAATGCGGCTCCAATTCTCG     |
| CAPS-10F | TGCTGCCTCGATTCTTCTTCC     |
| CAPS-10R | CGGAGTACCATTGTTTCGGGTGA   |
| CAPS-11F | TGCACAGAAGCGAGACAAACATCC  |
| CAPS-11R | TCGAGCATGACCAAGGCAGAAC    |
