# Supplementary material for: A Meiotic Drive Element in the Maize Pathogen Fusarium verticillioides Is Located Within a 102 kb Region of Chromosome V
Source: PubMed Central journal article supplement (PMC4978907; doi:10.1534/g3.116.029728), 2016-06-10
Supplement: supp_g3.116.029728_TableS2.pdf [file supp_g3.116.029728_TableS2.pdf]

**Table S2 CAPS marker sizes**

| marker  | PCR product length | Fv149 product<br>lengths after <i>Hae</i> III digest | Fv999 product<br>lengths after <i>Hae</i> III digest |
|---------|--------------------|------------------------------------------------------|------------------------------------------------------|
| CAPS-1  | 358                | 44, 86, 228                                          | 151, 207                                             |
| CAPS-2  | 307                | 132, 175                                             | 307                                                  |
| CAPS-3  | 311                | 311                                                  | 105, 206                                             |
| CAPS-4  | 288                | 110, 178                                             | 288                                                  |
| CAPS-5  | 265                | 119, 146                                             | 265                                                  |
| CAPS-6  | 325                | 34, 92, 199                                          | 34, 291                                              |
| CAPS-9  | 291                | 128, 163                                             | 291                                                  |
| CAPS-10 | 404                | 404                                                  | 68, 336                                              |
| CAPS-11 | 333                | 333                                                  | 108, 225                                             |
