# Supplementary material for: A Meiotic Drive Element in the Maize Pathogen Fusarium verticillioides Is Located Within a 102 kb Region of Chromosome V
Source: PubMed Central journal article supplement (PMC4978907; doi:10.1534/g3.116.029728), 2016-06-10
Supplement: supp_g3.116.029728_TableS3.pdf [file supp_g3.116.029728_TableS3.pdf]

|      |   |   |    |    |   |    |   |    |   |
|------|---|---|----|----|---|----|---|----|---|
| #91  | K | K | K  | K  | K | K  | K | K  | K |
| #92  | S | K | K  | K  | K | K  | K | nd | K |
| #93  | S | K | K  | K  | K | K  | K | K  | K |
| #94  | S | K | K  | K  | K | S  | K | K  | S |
| #95  | K | K | K  | K  | K | K  | K | K  | S |
| #96  | K | K | K  | K  | K | K  | S | K  | S |
| #97  | K | K | K  | K  | K | S  | K | K  | S |
| #98  | K | K | K  | nd | K | K  | K | K  | K |
| #99  | K | K | K  | K  | K | K  | K | S  | S |
| #100 | S | K | K  | K  | K | K  | K | K  | S |
| #101 | S | S | K  | K  | K | K  | K | S  | K |
| #102 | K | K | nd | K  | K | K  | S | K  | K |
| #103 | K | K | K  | K  | K | K  | S | K  | K |
| #104 | S | K | K  | K  | K | S  | S | S  | S |
| #105 | S | K | K  | K  | K | S  | K | K  | S |
| #106 | S | S | K  | K  | K | S  | S | S  | S |
| #107 | K | K | S  | K  | K | K  | S | S  | S |
| #108 | K | S | K  | K  | K | K  | K | nd | K |
| #109 | K | K | K  | K  | K | K  | K | K  | S |
| #110 | S | S | K  | K  | K | S  | S | S  | K |
| #111 | K | S | S  | S  | S | S  | K | S  | K |
| #112 | K | K | K  | K  | K | K  | S | nd | K |
| #113 | K | K | K  | K  | K | K  | K | S  | S |
| #114 | K | K | K  | K  | K | K  | K | S  | S |
| #115 | K | K | K  | K  | K | nd | S | S  | K |
| #116 | S | S | K  | K  | K | K  | K | K  | K |
| #117 | K | K | K  | K  | K | K  | K | S  | K |
| #118 | K | K | K  | S  | S | S  | K | K  | K |
| #119 | S | S | K  | K  | K | K  | K | S  | K |

The chromosome V CAPS markers (1 through 6) are arranged in the table according to their relative order on the chromosome. K = Fv999-*Sk<sup>K</sup>* genotype; S = Fv149-*Sk<sup>S</sup>* genotype; nd = not determined.
